# Supplementary material for: Diatom Biosilica Doped with Palladium(II) Chloride Nanoparticles as New Efficient Photocatalysts for Methyl Orange Degradation
Source: MDPI journal article supplement (doi:10.3390/ijms22136734), 2021-06-23
Supplement: s1 [file s1]

## SUPPLEMENTARY MATERIALS

*Article*

# Diatom Biosilica Doped with Palladium(II) Chloride Nanoparticles as New Efficient Photocatalysts for Methyl Orange Degradation

Myroslav Sprynskyy <sup>1,2,\*</sup>, Paulina Szczygłewska <sup>3</sup>, Izabela Wojtczak <sup>1,2</sup>, Izabela Nowak <sup>3</sup>, Andrzej Witkowski <sup>4</sup>,  
Bogusław Buszewski <sup>1,5</sup> and Agnieszka Feliczak-Guzik <sup>3,\*</sup>

<sup>1</sup> Faculty of Chemistry, Nicolaus Copernicus University in Toruń, 7 Gagarina Str, 87-100 Toruń, Poland;

izabelawojtczak1991@gmail.com (I.W.); bbusz@chem.umk.pl (B.B.)

<sup>2</sup> Department of Biopharmaceutics and Pharmacodynamics, Medical University of Gdańsk, Hallera 107, 80-416 Gdańsk, Poland

<sup>3</sup> Faculty of Chemistry, Adam Mickiewicz University in Poznań, Uniwersytetu Poznańskiego 8,

61-614 Poznań, Poland; paulina.debek@amu.edu.pl (P.S.); nowakiza@amu.edu.pl (I.N.)

<sup>4</sup> Institute of Marine and Environmental Sciences, University of Szczecin, Mickiewicza 16A, 70-383 Szczecin, Poland; andrzej.witkowski@usz.edu.pl

<sup>5</sup> Centre for Modern Interdisciplinary Technologies, Nicolaus Copernicus University in Toruń, Wileńska 4, 87-100 Toruń, Poland

\* Correspondence: mspryn@chem.umk.pl (M.S.); agaguzik@amu.edu.pl (A.F.-G.); Tel.: +48-618-291-747 (A.F.-G.)

The mass spectra and compound confirmation for the degradation products of MO.

#### NEGATIVE – ION MODE

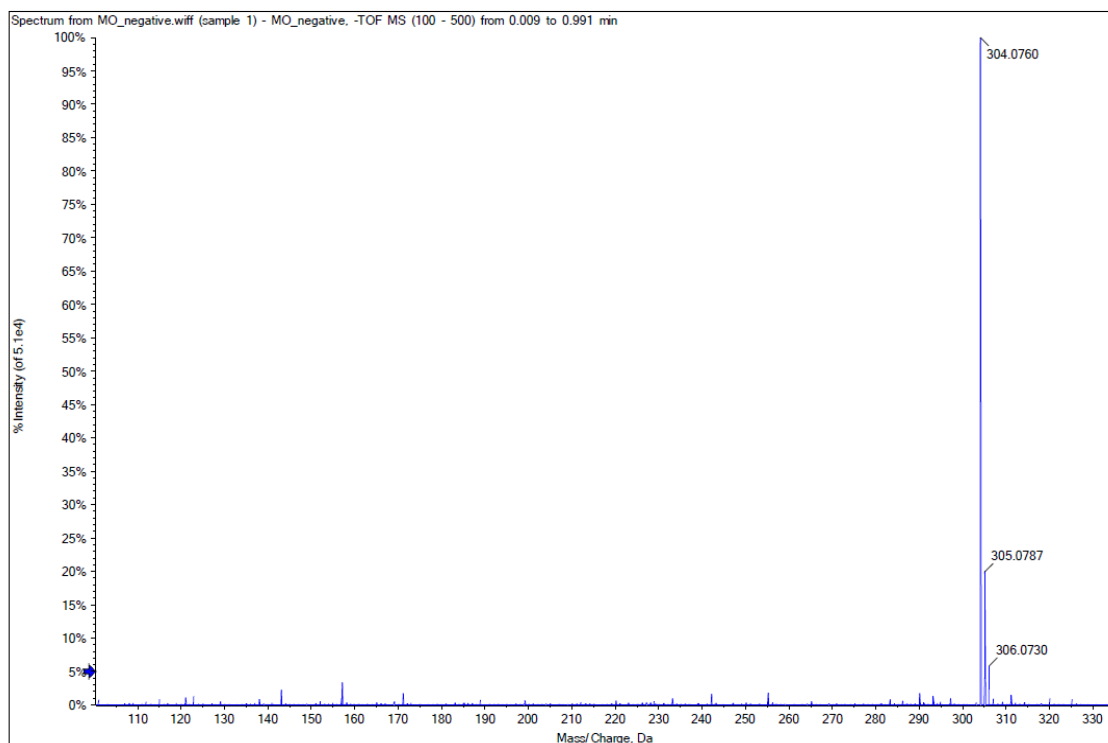

**Figure S1.** ESI-MS(-) of MO standard with molecular formula  $C_{14}H_{14}N_3SO_3$  ( $M_{MO}$ ,  $m/z$  – 304.0760)

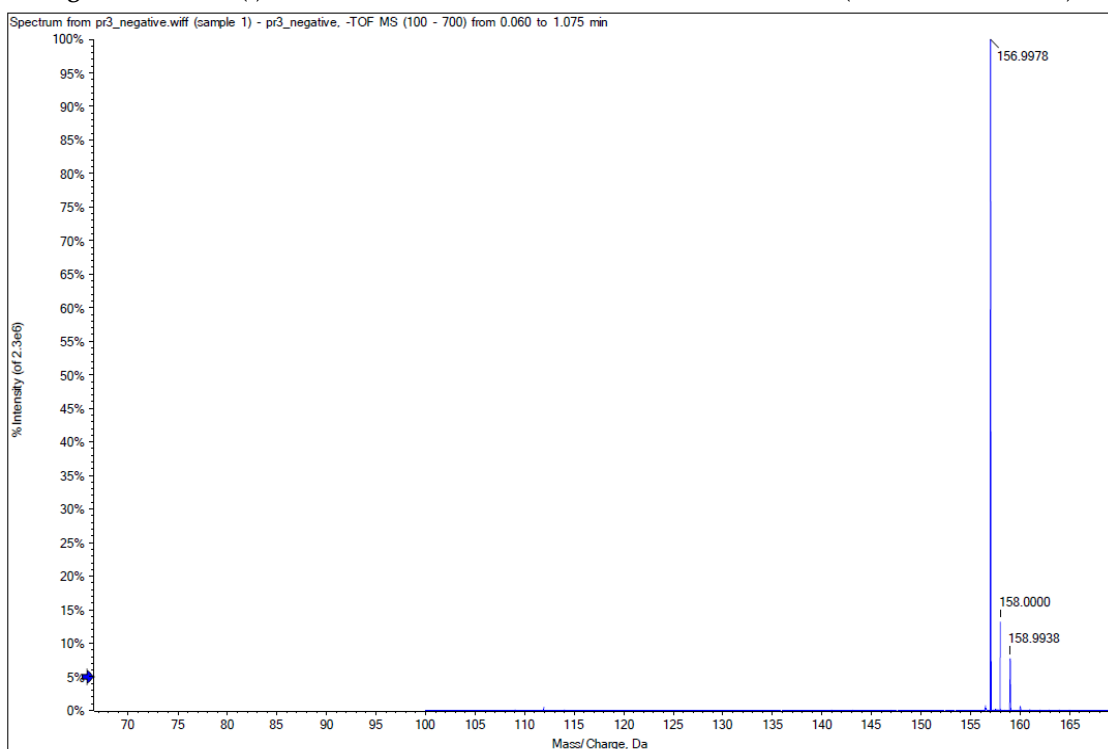

**Figure S2.** ESI-MS(-) of benzenesulphonic acid radical anion standard with molecular formula  $C_6H_5O_3S$  ( $M_{BA}$ ,  $m/z$  – 156.9978)

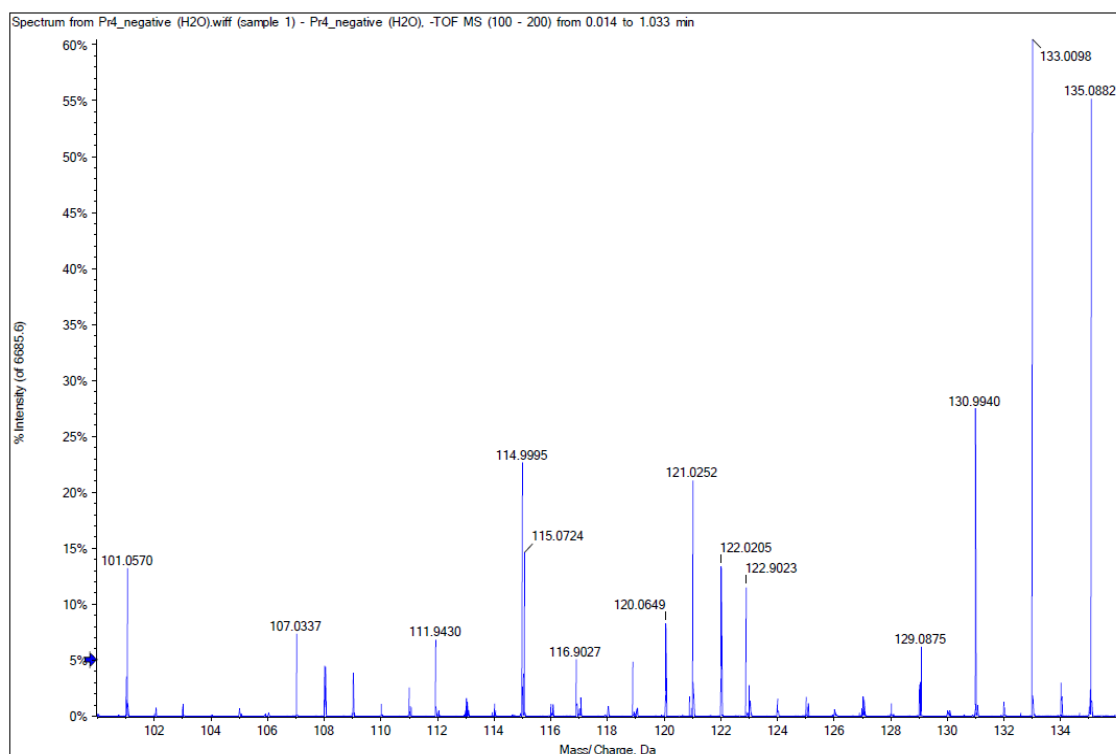

**Figure S3.** ESI-MS(-) of N,N-dimethyl-p-phenylenediamine radical anion standard with molecular formula  $C_8H_{11}N_2H$  ( $M_D$ ,  $m/z=135.0882$ )

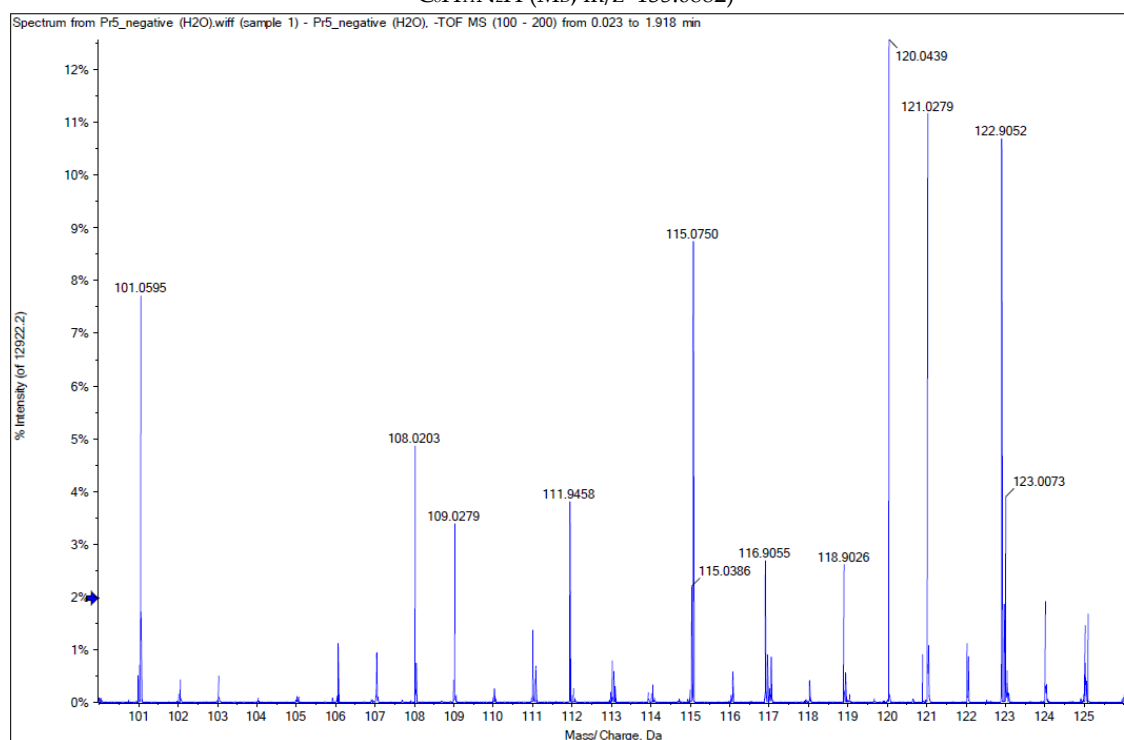

**Figure S4.** ESI-MS(-) of N,N-dimethylbenzenamine radical anion standard with molecular formula  $C_8H_{10}N$  ( $M_{DB}$ ,  $m/z = 120.0439$ )

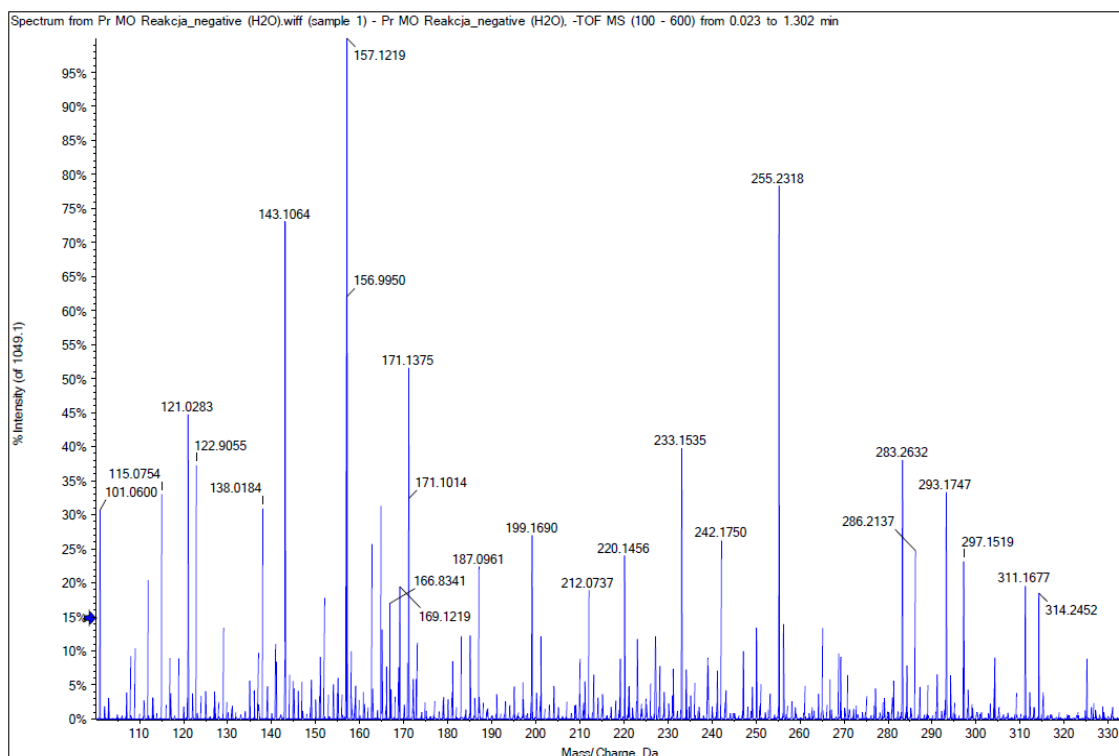

**Figure S5.** ESI-MS(-) of MO reaction mixture, Mass/Charge – 100-600 [Da]

## POSITIVE- ION MODE

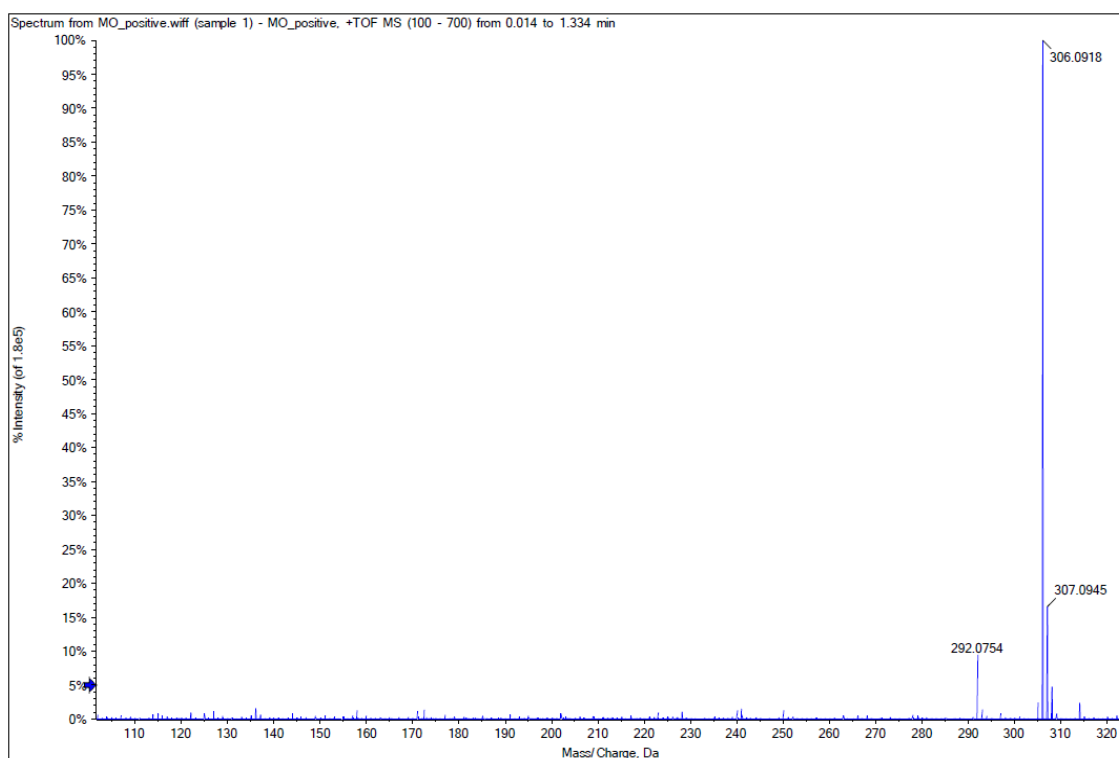

**Figure S6.** ESI-MS(+) of MO standard with molecular formula  $C_{14}H_{16}N_3SO_3$  ( $M_{MOH_2}$ ,  $m/z=306.0918$ )

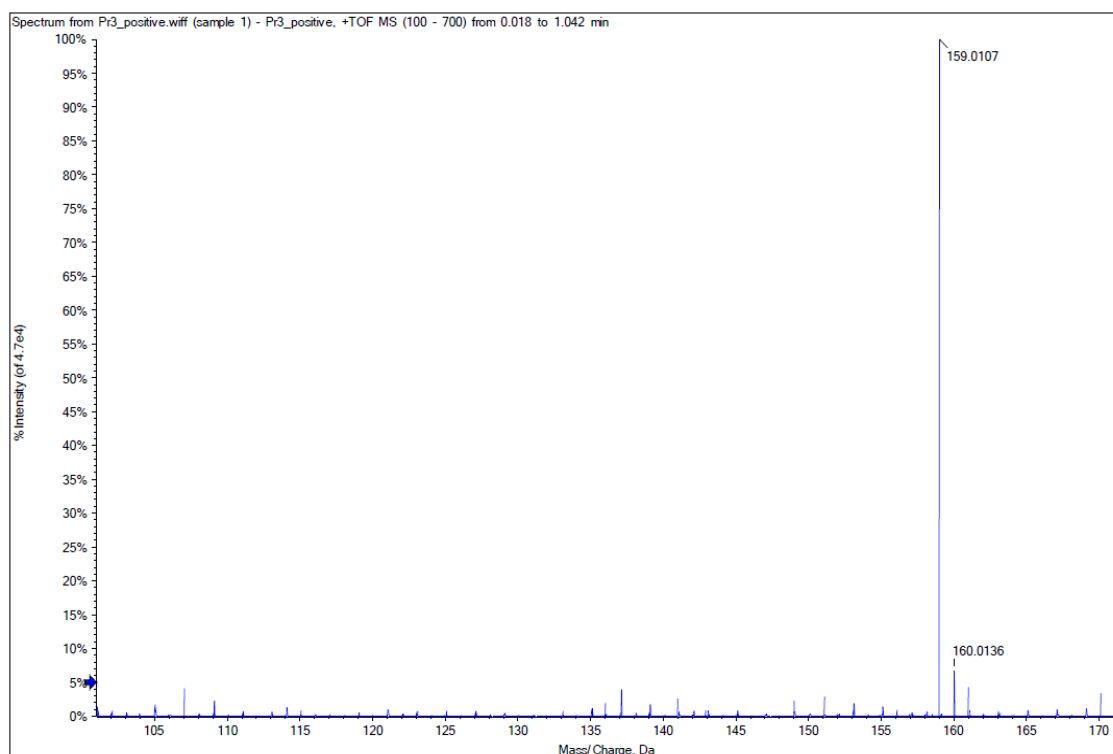

**Figure S7.** ESI-MS(+) of benzenesulphonic acid radical cation standard with molecular formula  $C_6H_5O_3SH_2$  ( $M_{BAH_2}$ ,  $m/z$  – 159.0107)

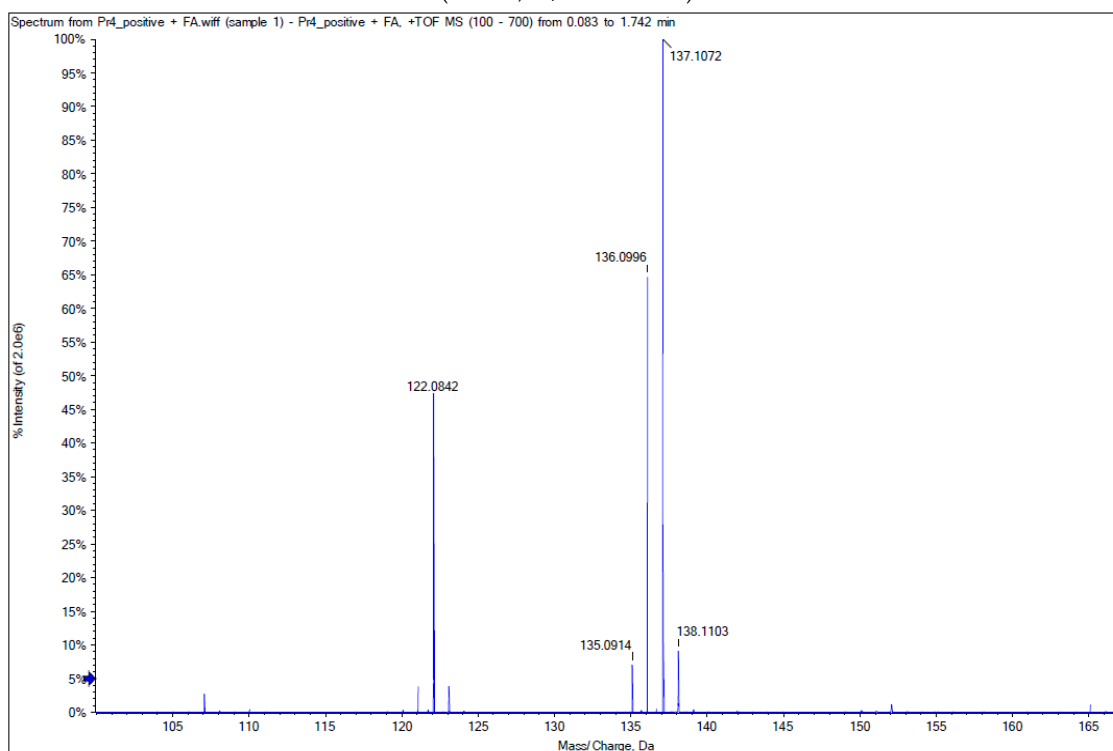

**Figure S8.** ESI-MS(+) of N,N-dimethyl-p-phenylenediamine radical cation standard with molecular formula,  $C_8H_{11}N_2H_2$  ( $M_{DH}$ ,  $m/z$  – 137.1072)

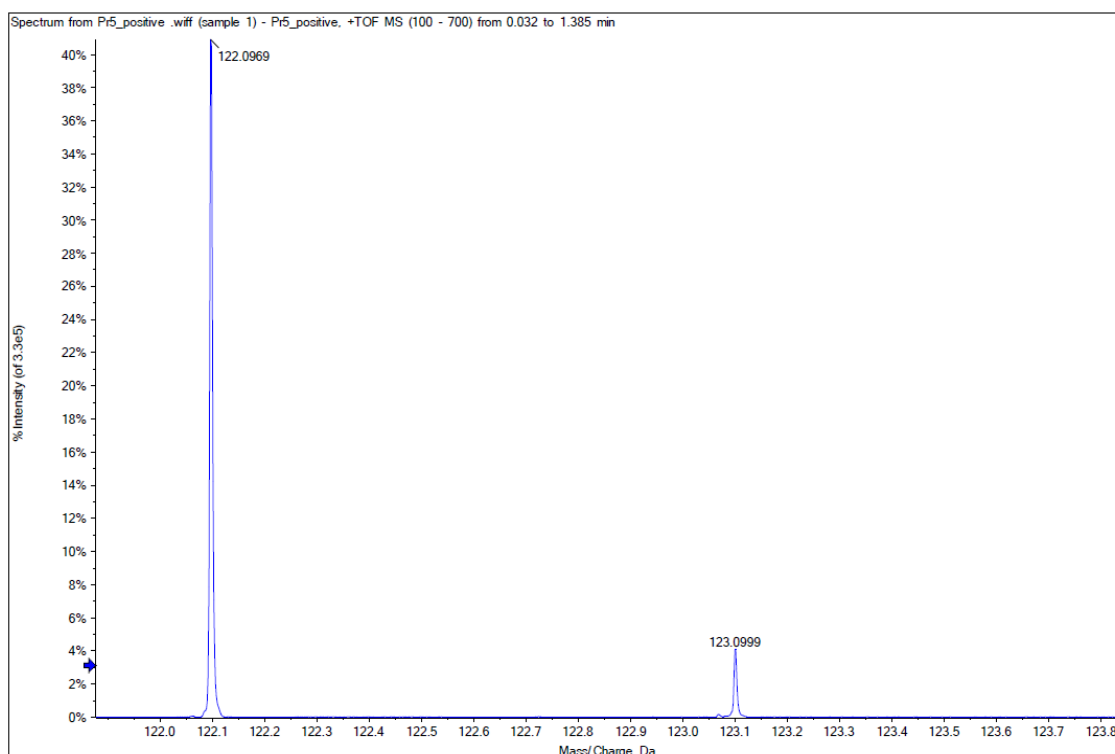

**Figure S9.** ESI-MS(+) of N,N-dimethylbenzenamine radical cation standard with molecular formula  $C_8H_{10}NH_2$  ( $M_{DBH_2}$ ,  $m/z = 122.0969$ )

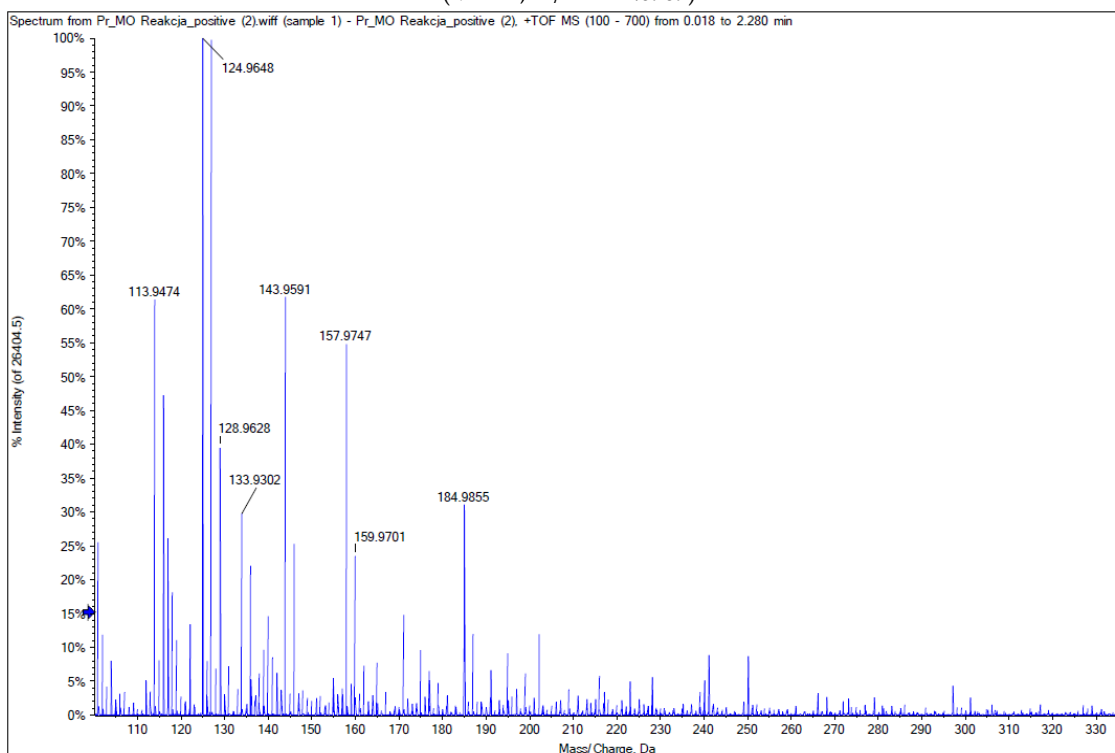

**Figure S10.** ESI-MS(+) of MO reaction mixture, Mass/Charge – 100-700 [Da]

**POSITIVE – ION MODE + FA (Formic acid)**

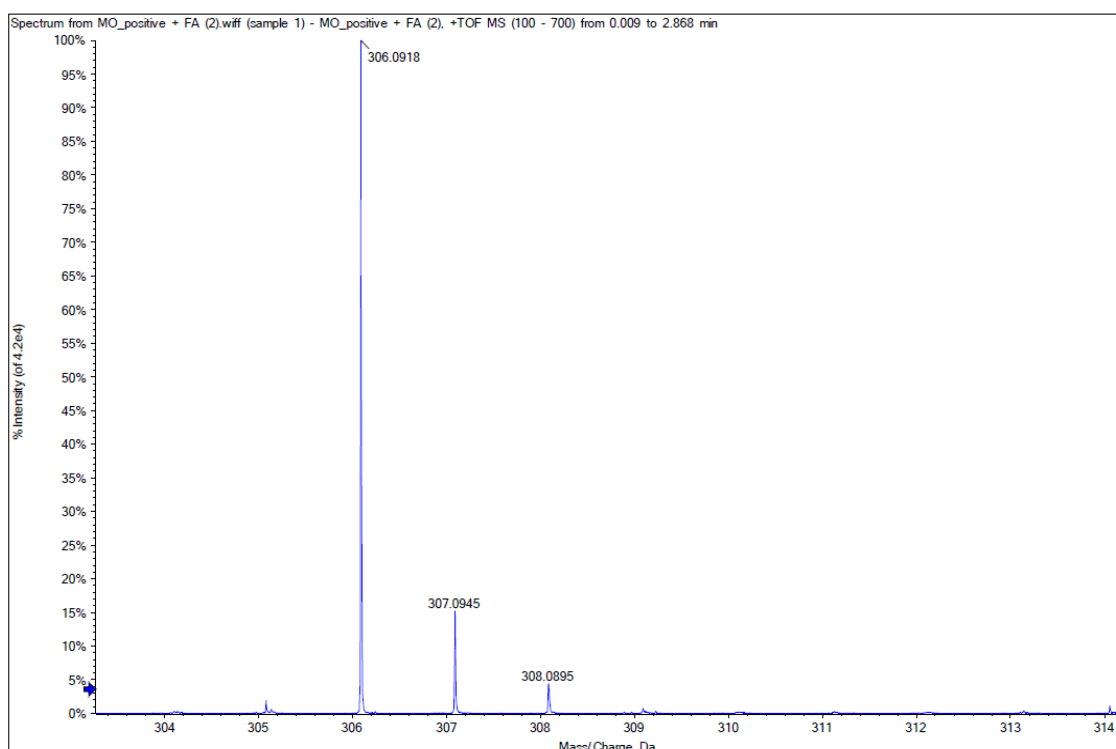

**Figure S11.** ESI-MS(+) + FA of MO standard with molecular formula  $C_{14}H_{16}N_3SO_3$  ( $M_{MOH_2}$ ,  $m/z=306.0918$ )

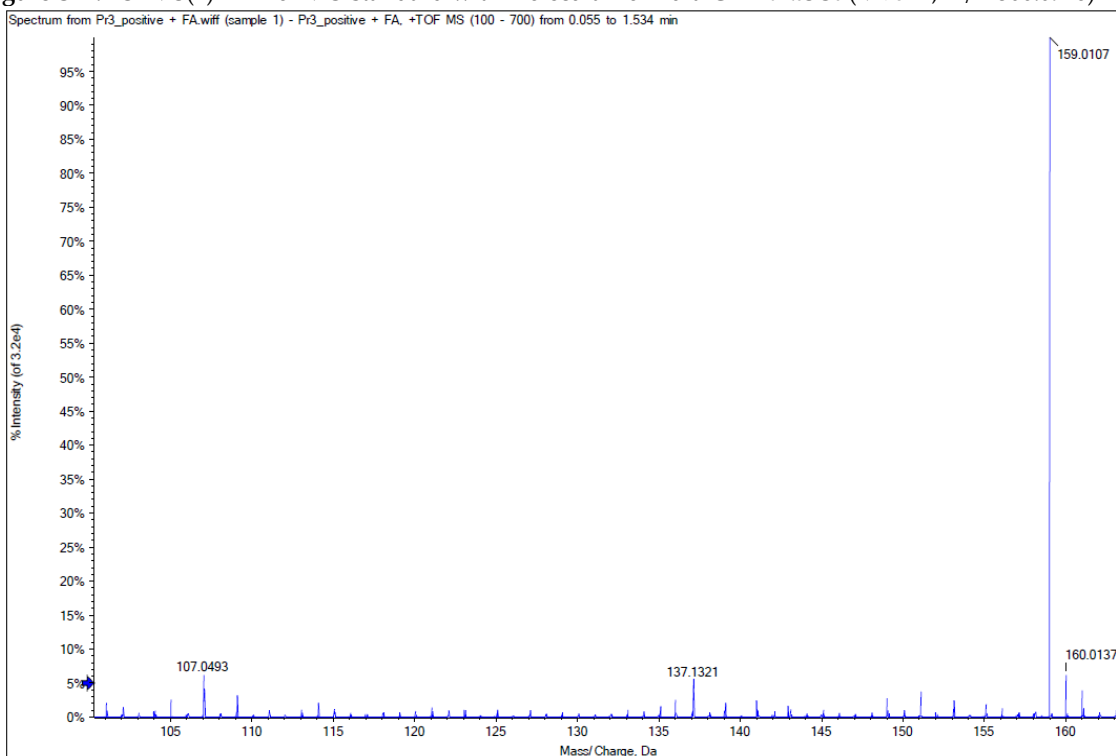

**Figure S12.** ESI-MS(+) + FA of benzenesulphonic acid radical cation standard with molecular formula  $C_6H_5O_3SH_2$  ( $M_{BAH_2}$ ,  $m/z - 159.0107$ )

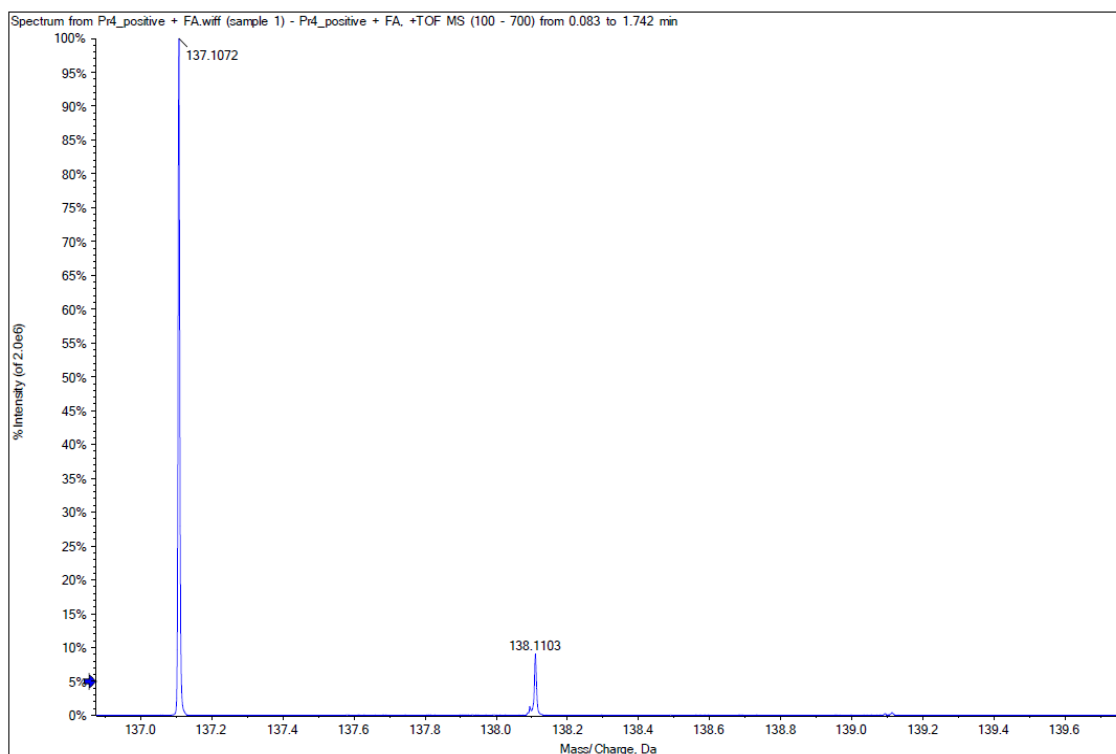

**Figure S13.** ESI-MS(+) + FA of N,N-dimethyl-p-phenylenediamine radical cation standard with molecular formula,  $C_8H_{11}N_2H_2$  ( $M_{DH}$ ,  $m/z$  – 137.1072)

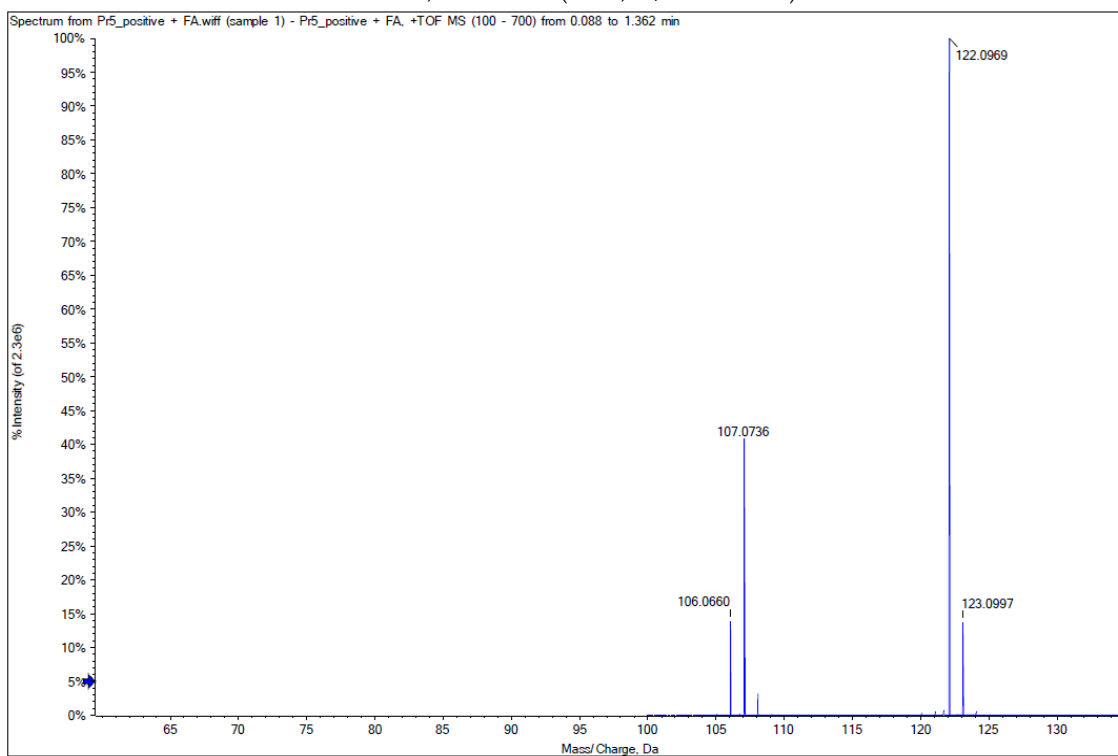

**Figure S14.** ESI-MS(+) + FA of N,N-dimethylbenzenamine radical cation standard with molecular formula  $C_8H_{10}NH_2$  ( $M_{DBH_2}$ ,  $m/z$  = 122.0969)



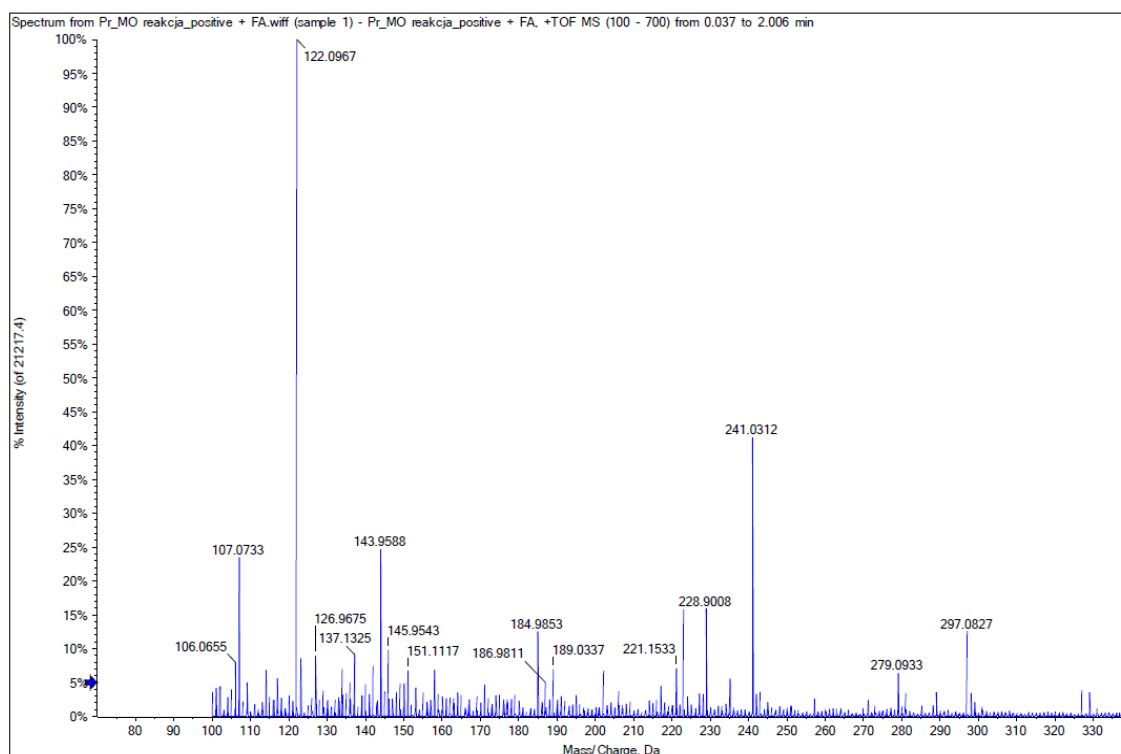

**Figure S15.** ESI-MS(+) + FA of MO reaction mixture, Mass/Charge – 100-700 [Da]
